# Supplementary material for: Rbm38 Reduces the Transcription Elongation Defect of the SMEK2 Gene Caused by Splicing Deficiency
Source: PubMed Central journal article supplement (PMC7699959; doi:10.3390/ijms21228799), 2020-11-20
Supplement: ijms-21-08799-s001.pdf [file ijms-21-08799-s001.pdf]

## Supplementary Information

# **Rbm38 reduces transcription elongation defect of SMEK2 gene caused by splicing deficiency**

**Shintaro Muraoka<sup>1</sup>, Kazuhiro Fukumura<sup>2</sup>, Megumi Hayashi<sup>1</sup>, Naoyuki Kataoka<sup>3</sup>, Akila Mayeda<sup>2</sup> and**

**Daisuke Kaida<sup>1\*</sup>**

<sup>1</sup> Graduate School of Medicine and Pharmaceutical Sciences, University of Toyama, 2630 Sugitani, Toyama 930-0194, Japan; [kaida@med.u-toyama.ac.jp](mailto:kaida@med.u-toyama.ac.jp)

<sup>2</sup> Division of Gene Expression Mechanism, Institute for Comprehensive Medical Science, Fujita Health University, Kutsukake-cho, Toyoake, Aichi 470-1192, Japan

<sup>3</sup> Department of Animal Resource Sciences, Graduate School of Agricultural and Life Sciences, The University of Tokyo, 1-1-1 Yayoi, Bunkyo-ku, Tokyo 113-8657, Japan

\* Correspondence: [kaida@med.u-toyama.ac.jp](mailto:kaida@med.u-toyama.ac.jp)

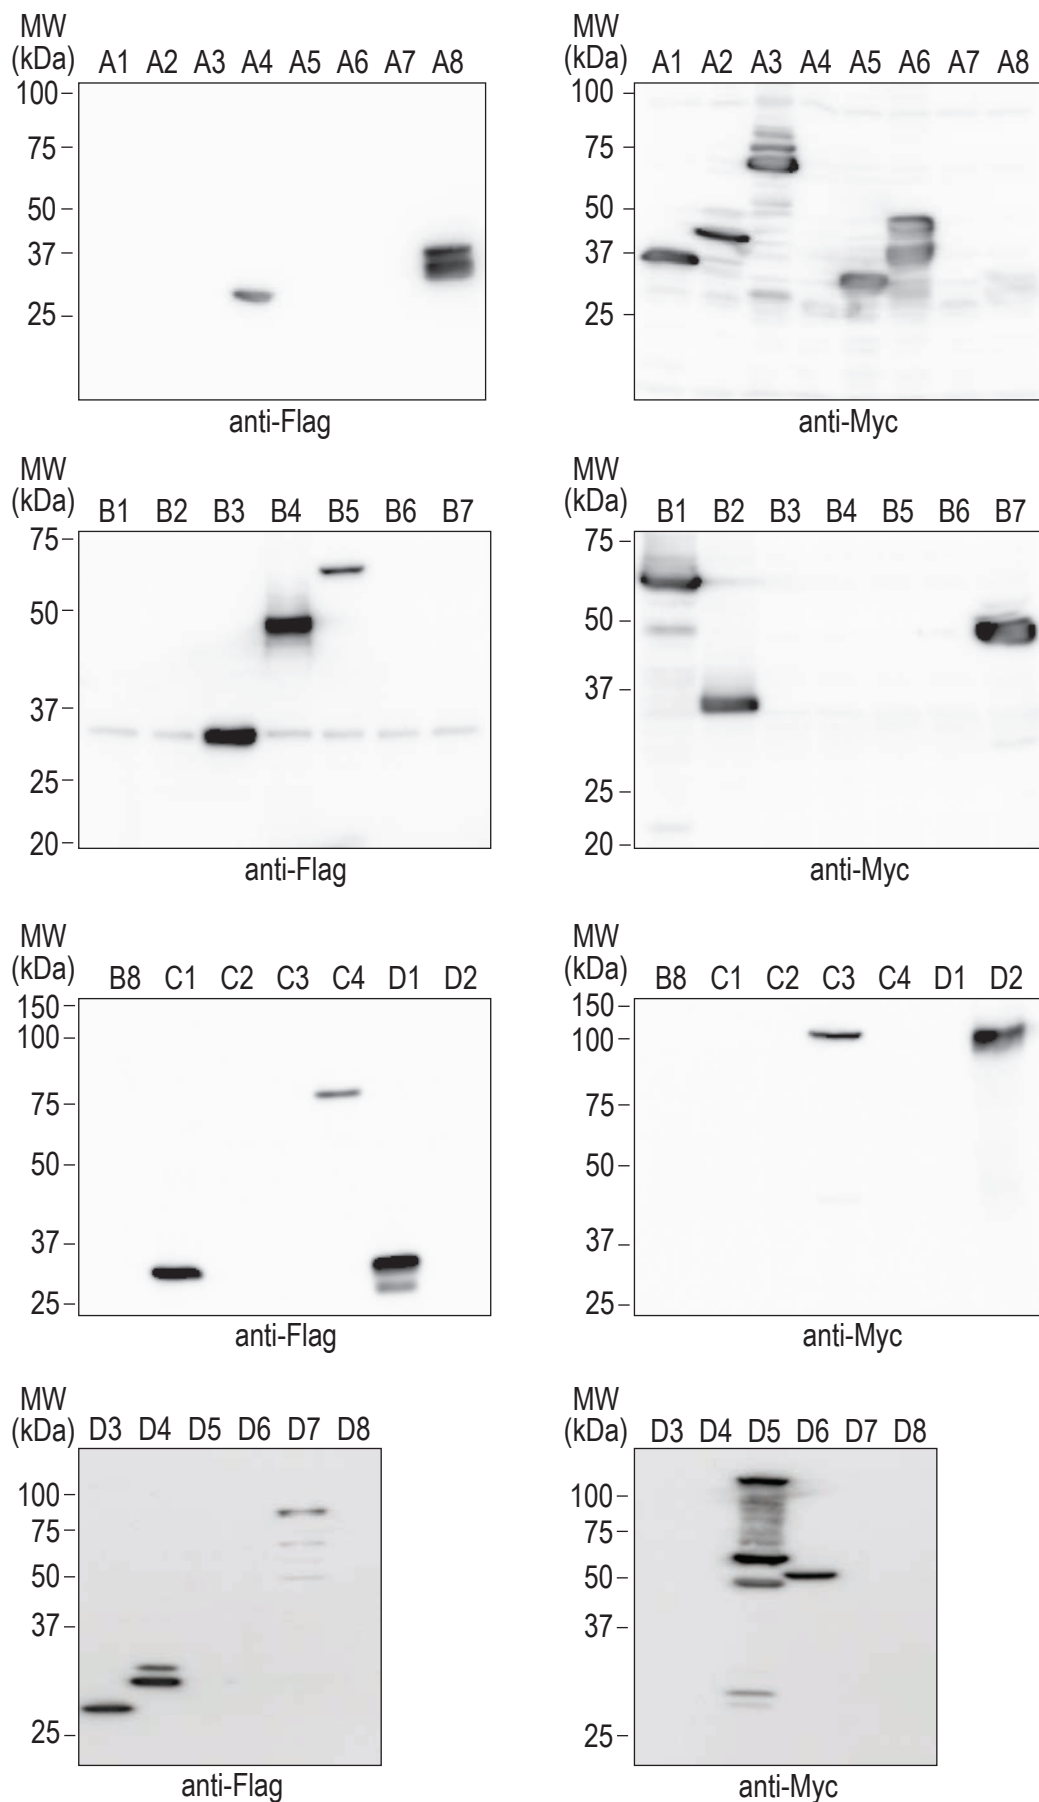

**Figure S1. Protein expression of RNA-binding proteins.**

HeLa cells were transfected with plasmids expressing RNA-binding proteins and then cultured for 48 h. Total lysate of the cells was analysed by western blotting to evaluate the expression levels of the RNA binding proteins.

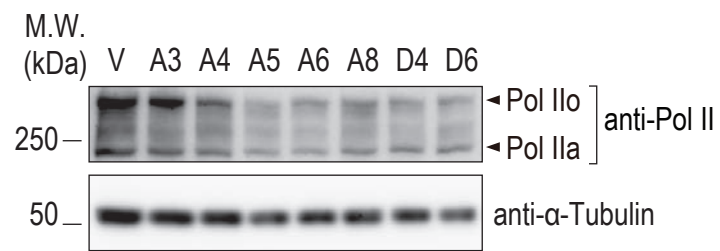

**Figure S2. Phosphorylation status of Pol II upon over expression of RBPs.**

HeLa cells were transfected with plasmids expressing RNA-binding proteins and then cultured for 48 h, then treated with 10 ng/ml SSA for 3 h. Total lysate of the cells was analysed by western blotting to evaluate the phosphorylation status of Pol II.

Pol Ilo: hyperphosphorylated form; Pol Ila: hypophosphorylated form.

```
1 aaatgtgtgttaggctgggtgcagtggtcacacctgtaatcccagcac 50
51 tttgggaggtcgaggcagggcgatcgcttgagcccaggagttggagttcc 100
101 agaccaacctgggcaaaatggtgaaacctgtctctacgaaaaattagtg 150
151 tggcgtgtgtgtgtcacctgtagtcccagctacttgggaggctgaggtgg 200
201 gaggattgctggggcctaggaggtcgaggctgcagtgagtcgtgattgta 250
251 ccctacactctagtctggtcacagagcaagacctgtctcaaggaggaa 300
301 acaacaaaatatatatatgtatatttgtgtgtatgtgtgtgtgtgtgtgt 350
351 gtgtctatgttttattttaaatccaaaccttggtttctaatacaaggggt 400
401 gacaaccttttcctaaaaatgtaactaacctttggtagcatataattg 450
451 aagacattctaggagactgcttacctaaaccttgggctaatttttctaca 500
501 ccctaagctaaggactgaactgggtgc
```

**Figure S3.** The DNA sequence of the part of the *SMEK2* intron 4 used for the RNA binding assay. The red letters indicate putative Rbm38 binding sequences.

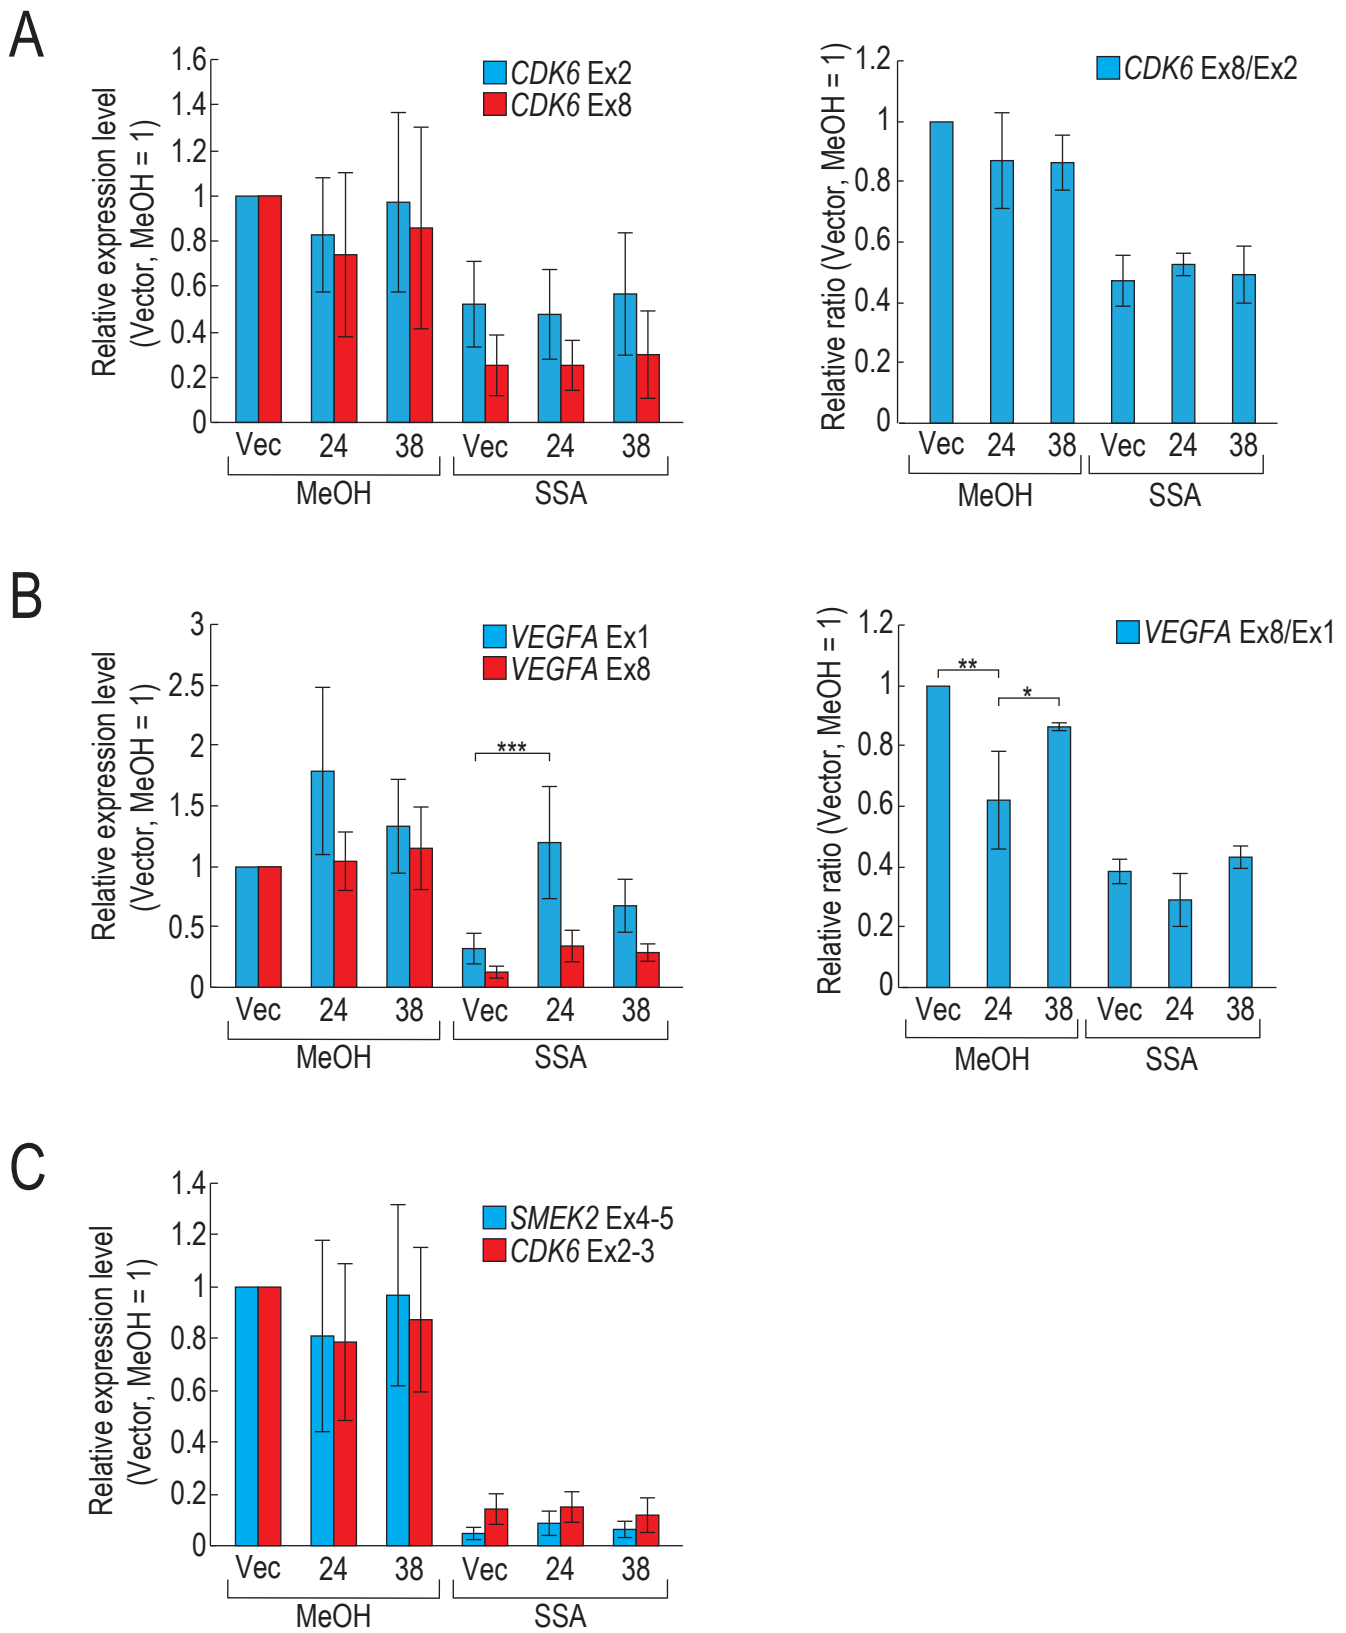

**Figure S4. The effects of Rbm38 and Rbm24 on transcription elongation and splicing.**

(A, B, C) HeLa cells were transfected with a plasmid, Flag-Rbm24 or Flag-Rbm38, and then cultured for 48 h.

The transfected cells were treated with SSA and 5-EU, and the labelled RNA was analysed as in Fig. 1.

Error bars indicate S.D. (n = 3). Statistical significance was investigated by one-way ANOVA and Tukey's test

(\*:  $p < 0.05$ ; \*\*:  $p < 0.01$ ; \*\*\*:  $p < 0.001$ ).

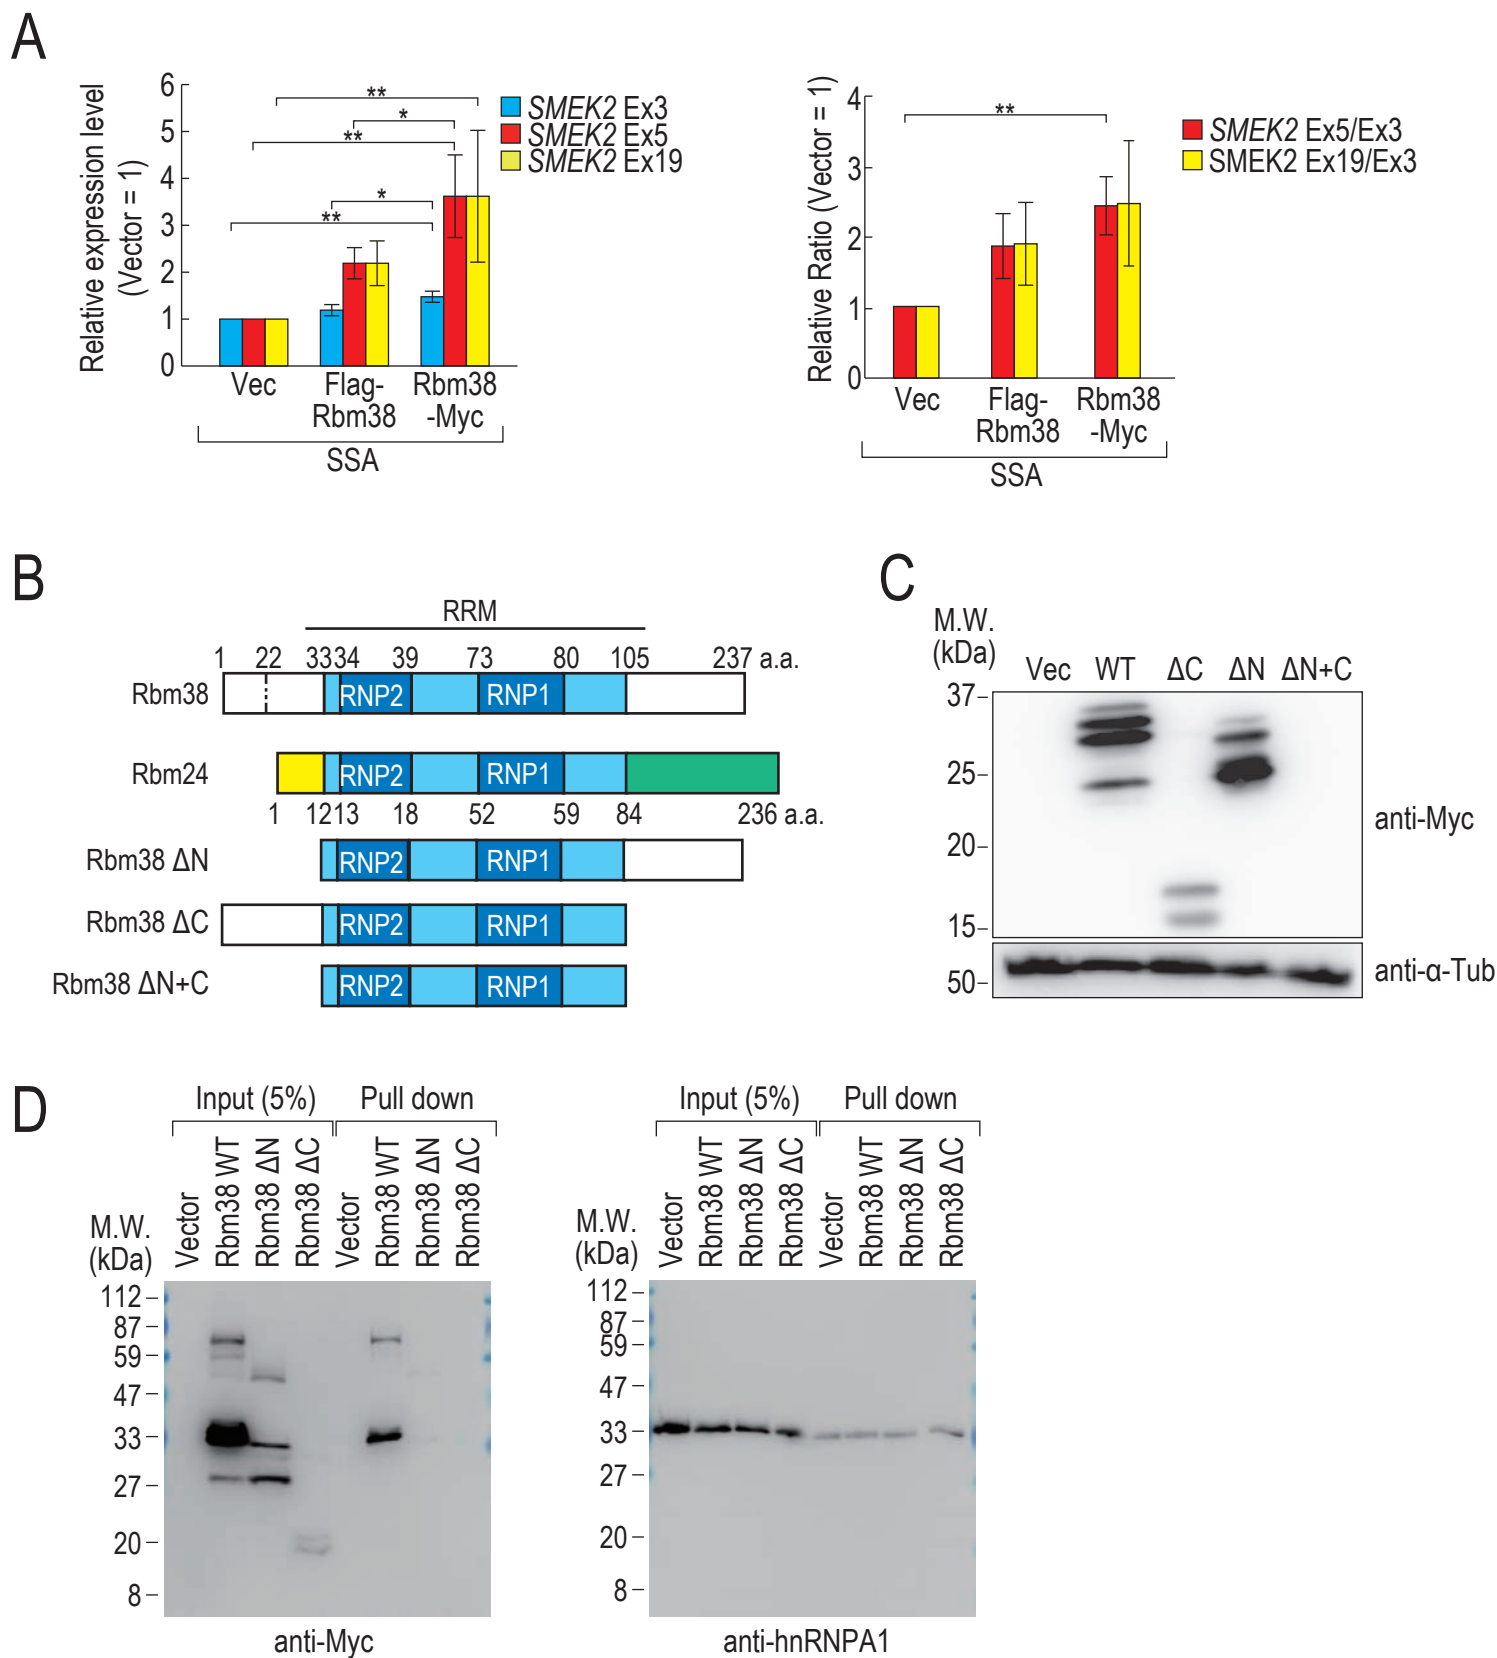

**Figure S5. The N- and C-terminal regions are important for gene expression and RNA binding capacity.**

(A) HeLa cells were transfected with a plasmid, Flag-Rbm38 or Rbm38-Myc, and then cultured for 48 h. The transfected cells were treated with SSA and 5-EU, and the labelled RNA was analysed as in Fig. 1. Error bars indicate S.D. ( $n = 3$ ). Statistical significance was investigated by one-way ANOVA and Tukey' s test (\*:  $p < 0.05$ ; \*\*:  $p < 0.01$ ). (B) A schematic of the structure of the indicated RNA binding proteins. (C) HeLa cells were transfected with a vector (Vec), Rbm38-WT or the N- and/or C-terminal region deletion mutants ( $\Delta N$ ,  $\Delta C$ ,  $\Delta N+C$ ), and then cultured for 48 h after transfection. Protein samples were prepared and analysed by western blotting. (D) A biotinylated RNA pull-down assay was performed using WT and the N- and/or C-terminal region deletion mutants as in Fig. 2C.

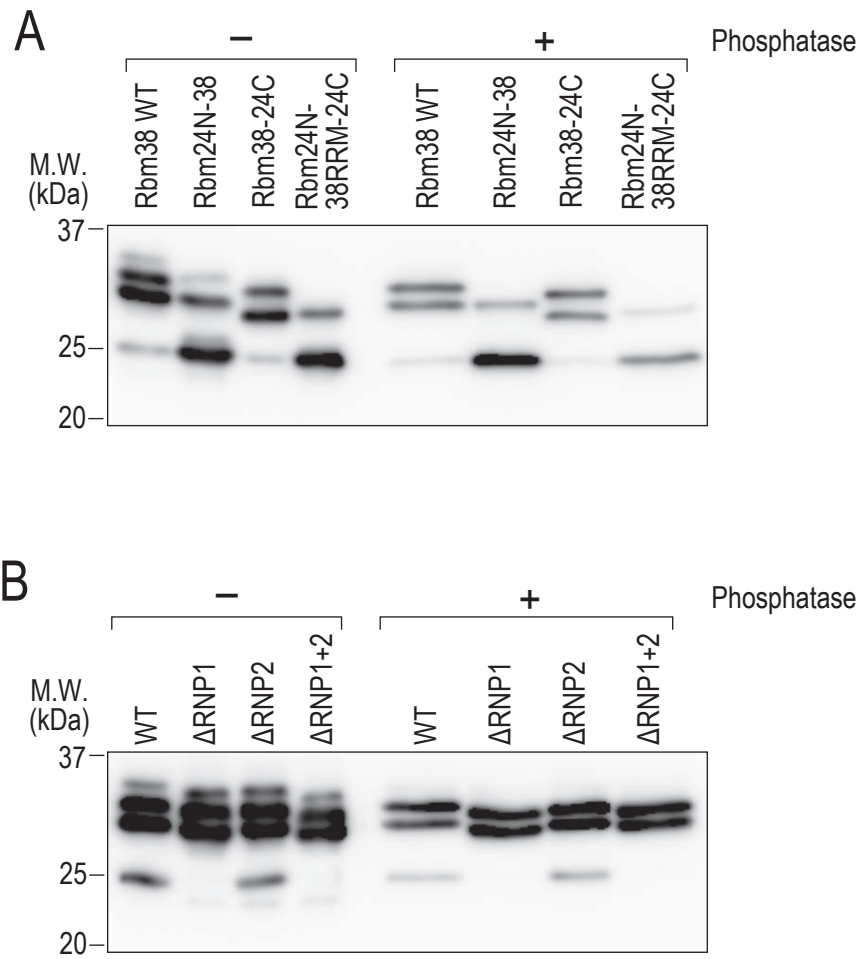

**Figure S6. Exogenous Rbm38 WT and mutants are phosphorylated and truncated.**

(A, B) HeLa cells were transfected with Rbm38 plasmids and cultured for 48 h, Total lysate were prepared and treated with protein phosphatase. The lysates were analysed by western blotting.

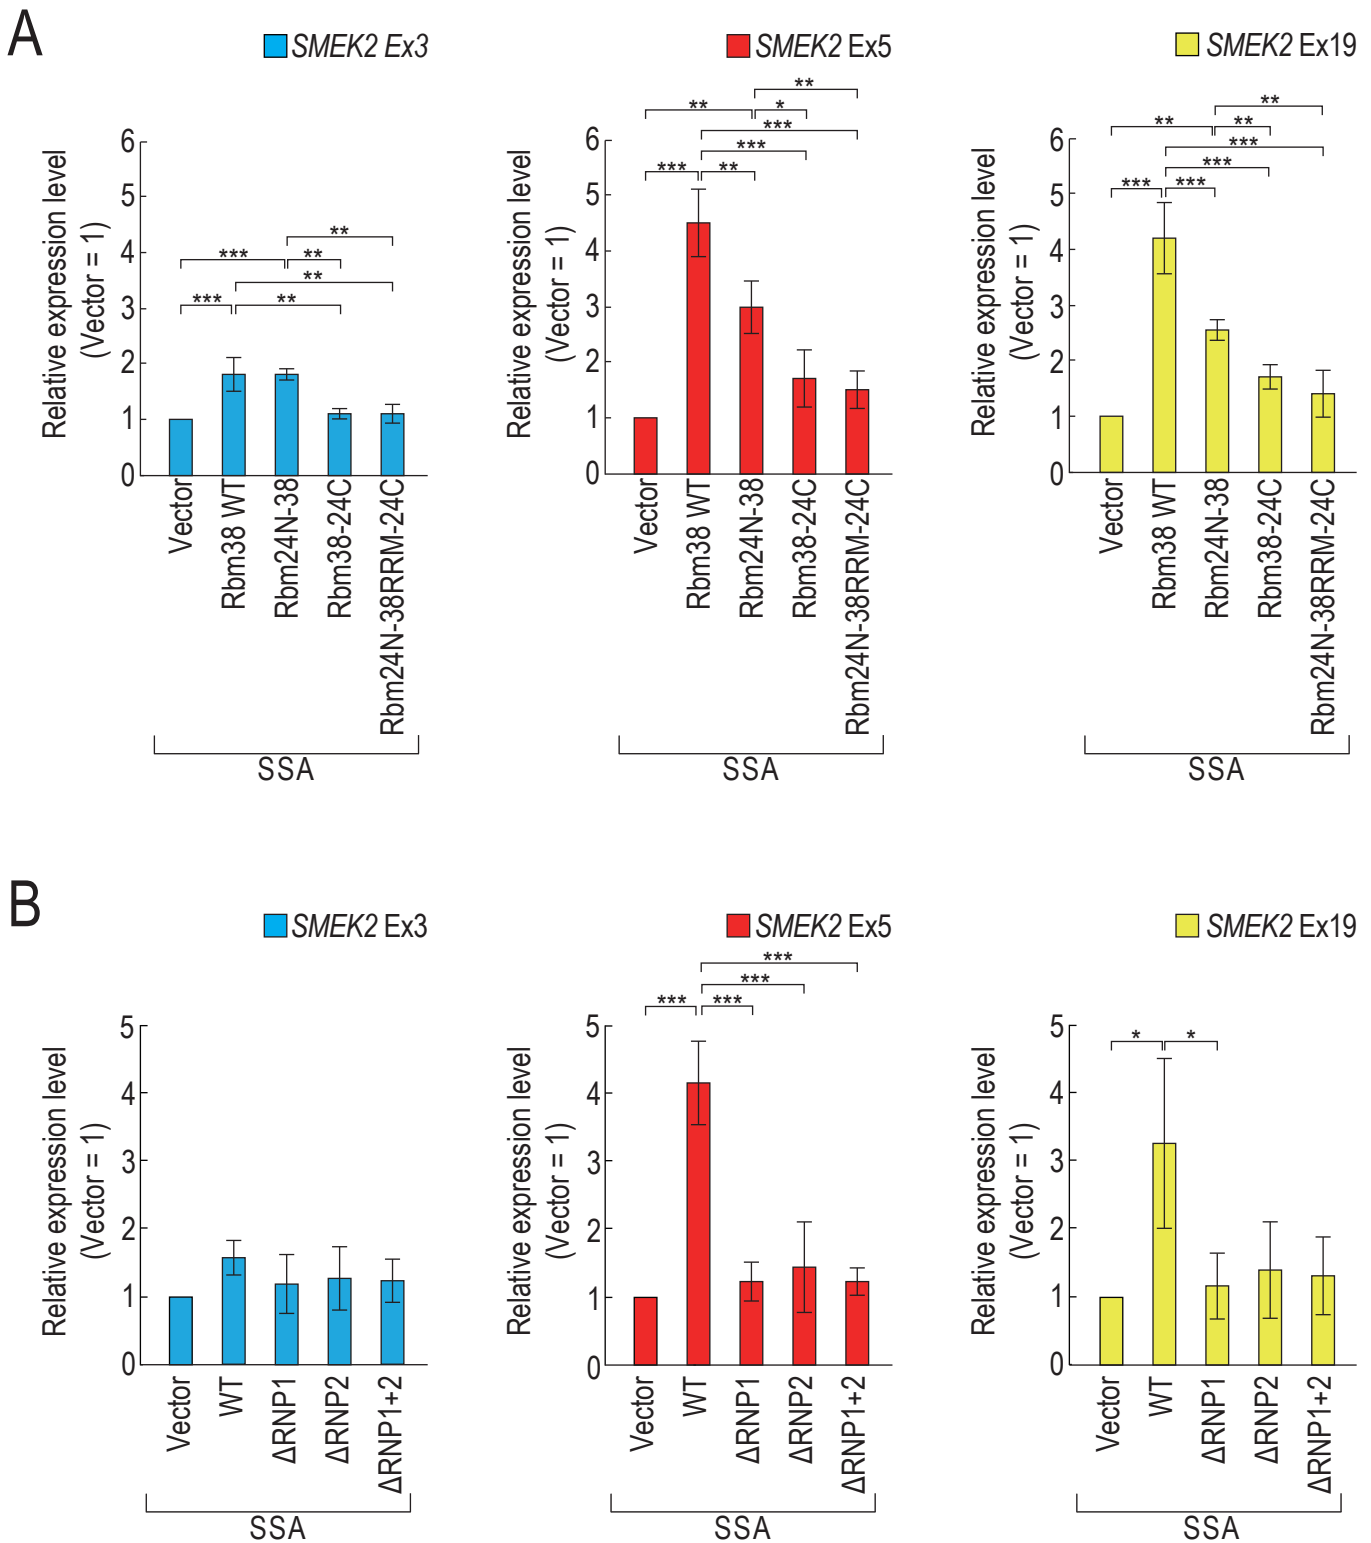

**Figure S7. The N- and C-terminal regions and RBD/RRM domain of Rbm38 are important for suppressing the transcription elongation defect.**

(A, B) HeLa cells were transfected with a vector or chimeric plasmids, and then cultured for 48 h after transfection (A). HeLa cells were transfected with a vector or RNP deletion mutants, and then cultured for 48 h (B). The transfected cells were treated with SSA and 5-EU, and the labelled RNA was analysed as in Fig. 1. Error bars indicate S.D. (n = 3).

Statistical significance was investigated by one-way ANOVA and Tukey's test (\*: p<0.05; \*\*: p<0.01; \*\*\*: p<0.001).



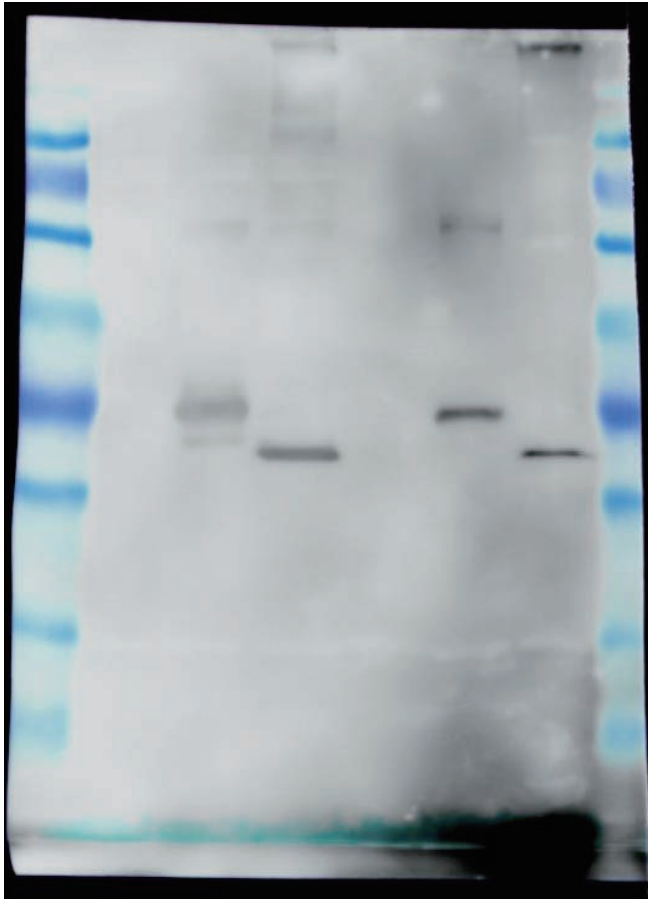

anti-Flag

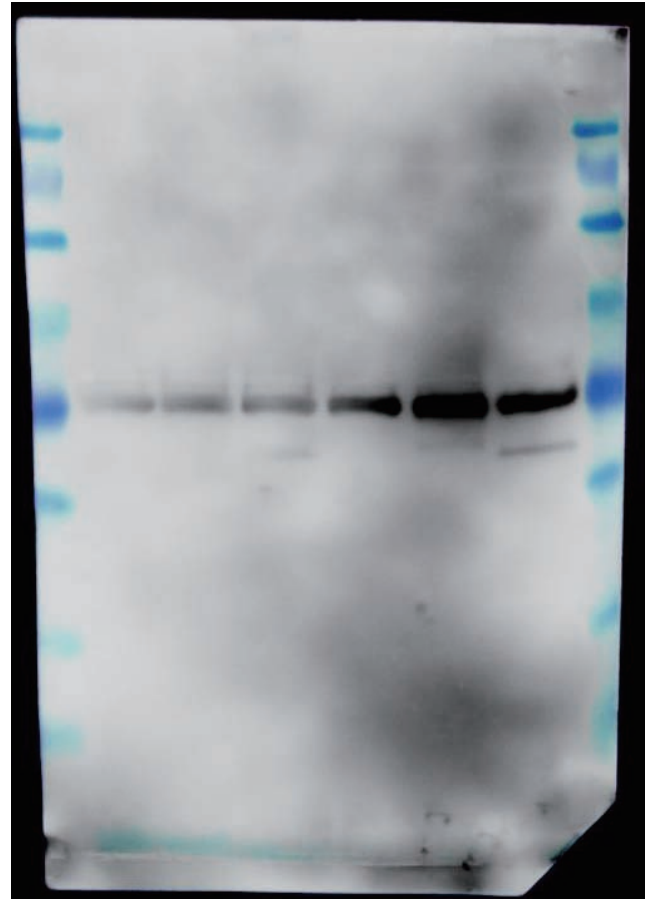

anti-hnRNPA1

**Figure. S8. Images of the full-length, unprocessed membranes and western blots shown in Fig. 2C.**

A

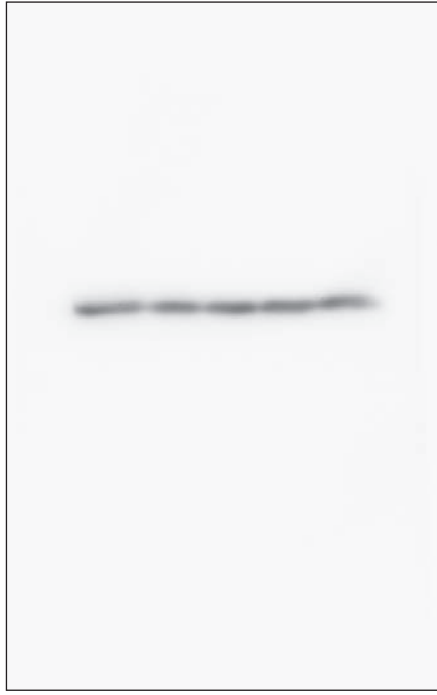

anti- $\alpha$ -Tub

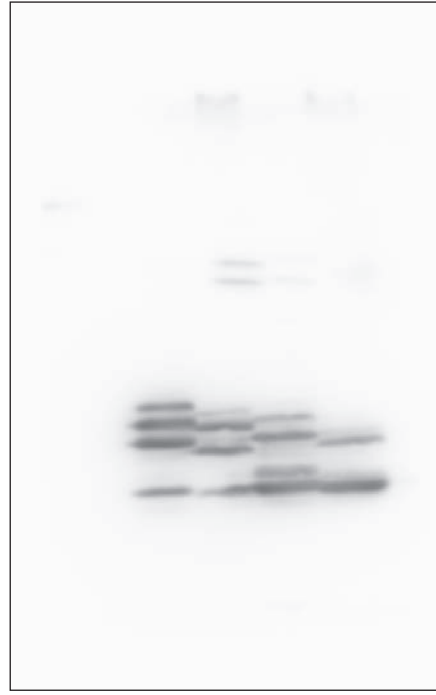

anti-Myc

B

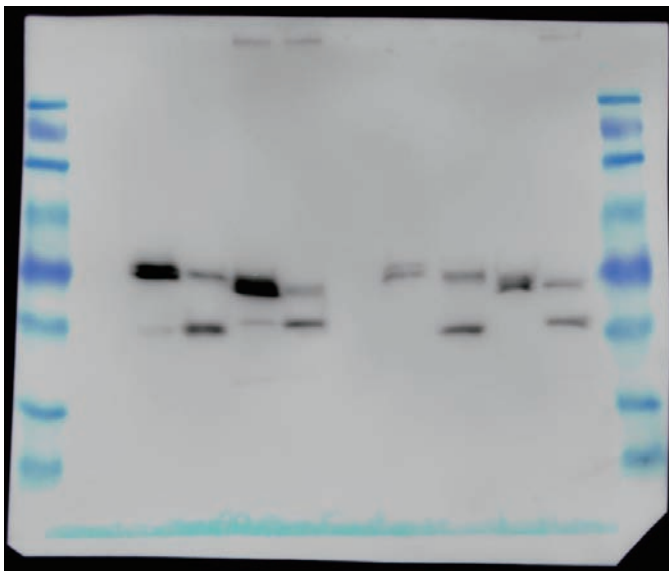

anti-Myc

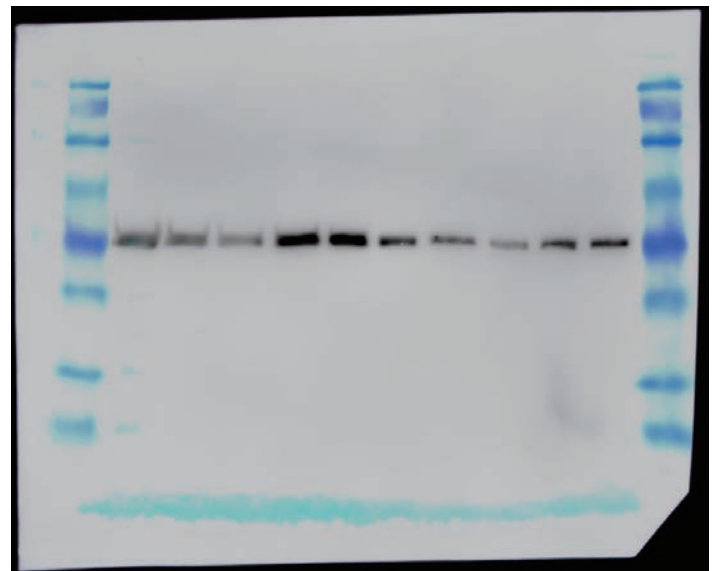

anti-hnRNPA1

Figure. S9. Images of the full-length, unprocessed membranes and western blots shown in Fig. 3B (A) and 3D (B).

A

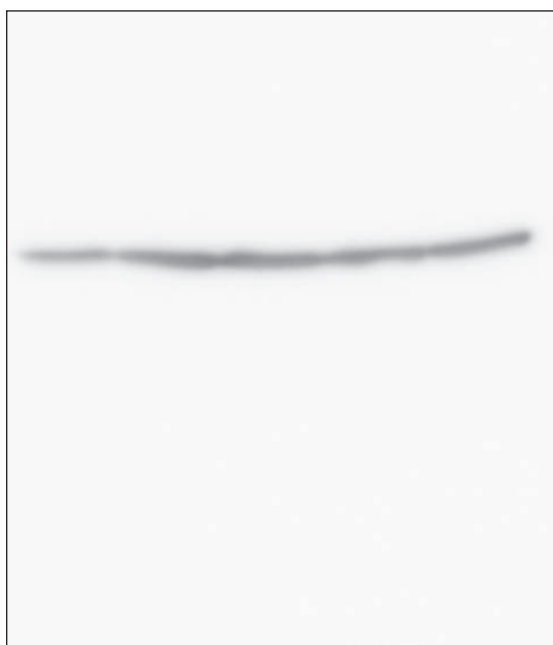

anti- $\alpha$ -Tub

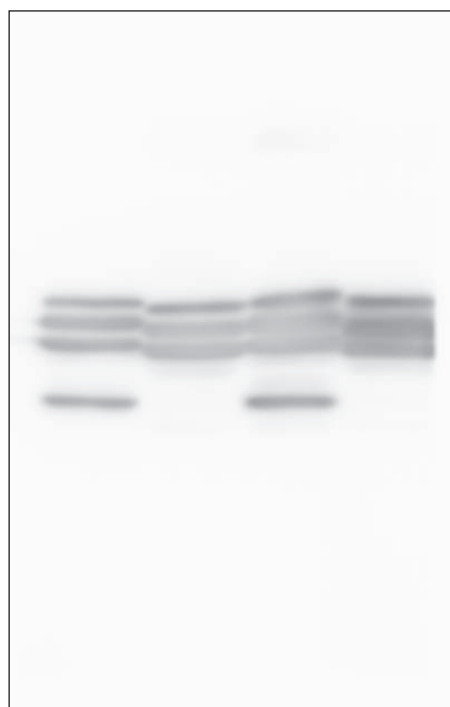

anti-Myc

B

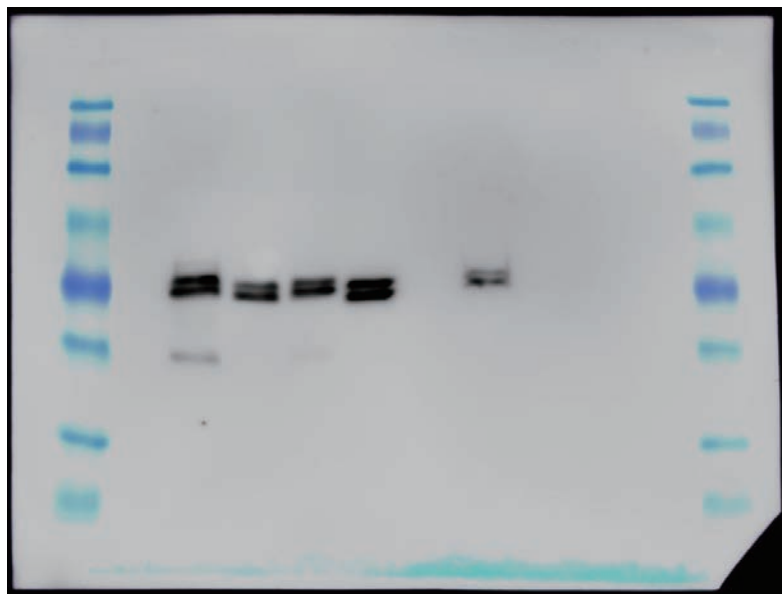

anti-Myc

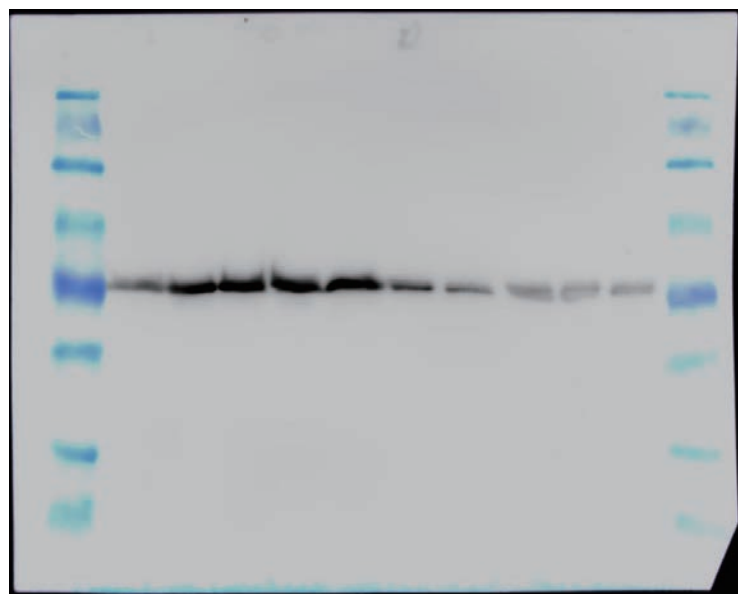

anti-hnRNPA1

Figure. S10 Images of the full-length, unprocessed western blots shown in Fig. 4B (A) and 4D (B).

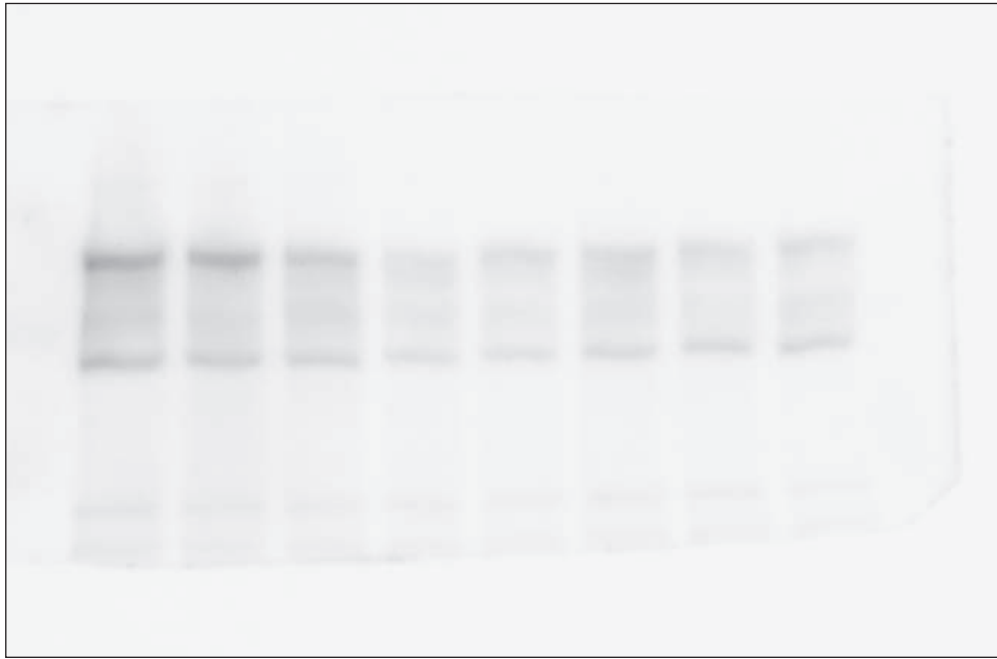

anti-Pol II

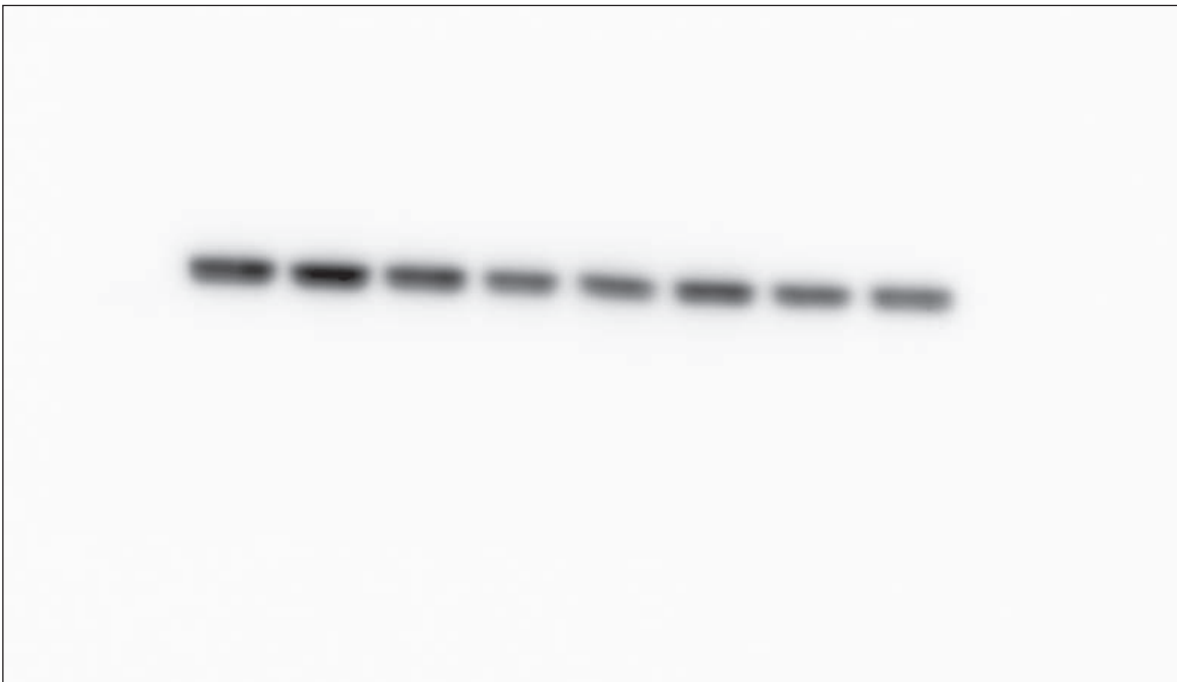

anti- $\alpha$ -Tubulin

**Figure. S11. Images of the full-length, unprocessed western blots shown in Fig. S2.**

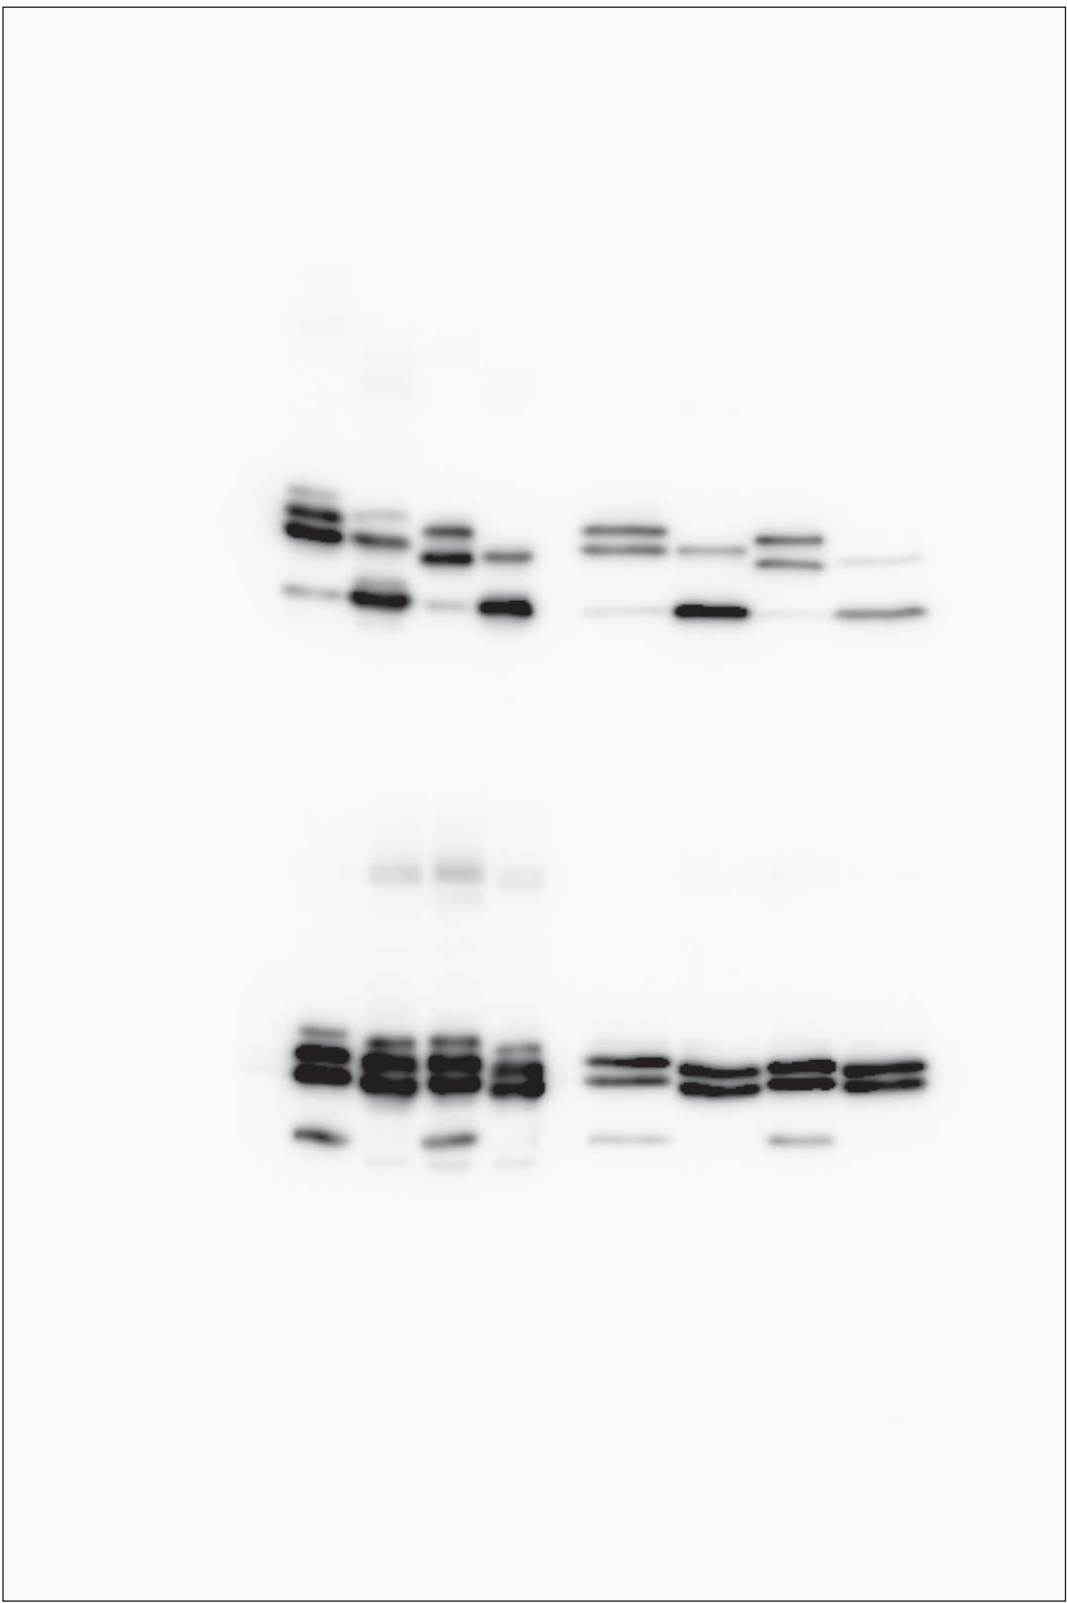

Figure. S12. Images of the full-length, unprocessed western blots shown in Fig. S6.

Table S1 RNA binding proteins used in this study. The 23 RBPs which were used in Figure 1 were in red letters.

|    |                       |
|----|-----------------------|
| A1 | Myc-hnRNP A           |
| A2 | Myc-hnRNP C           |
| A3 | Myc-hnRNP L           |
| A4 | Flag-SRp30 (SRSF9)    |
| A5 | Myc-SC35 (SRSF2)      |
| A6 | Myc-SRp46 (SRSF8)     |
| A7 | Myc-9G8 (SRSF7)       |
| A8 | Flag-mouseSF2 (SRSF1) |
| B1 | Myc-U2AF65            |
| B2 | Myc-U2AF35            |
| B3 | Flag-Aly              |
| B4 | Flag-RNPS1            |
| B5 | Flag-hUpf3            |
| B6 | Flag-Magoh            |
| B7 | Myc-eIF4AIII          |
| B8 | Flag-MLN51            |
| C1 | Flag-Y14              |
| C2 | Flag-DEK              |
| C3 | Myc-CBP80             |
| C4 | Flag-RBM17            |
| D1 | Flag-SRp20            |
| D2 | Myc-SRp75             |
| D3 | Flag-mouseRBM24       |
| D4 | Flag-mouseRBM38       |
| D5 | Myc-PUF60             |
| D6 | Flag-mouseCUGBP2      |
| D7 | PSF/SFPQ-Flag         |
| D8 | Flag-Staufen          |

Table S2 Top10 Rbm38 binding motifs reported by Heinicke et al. (Ref. 22)

|         |
|---------|
| GTGTGTG |
| TGTGTGT |
| GTGTGTT |
| GGTGTGT |
| AGTGTGT |
| CGTGTGT |
| TTGTGTG |
| GTTGTGT |
| GTGTGGT |
| TGGTGTG |

Table S3. List of primers used in this study.

| For cloning                      |                                                                  |
|----------------------------------|------------------------------------------------------------------|
| Name                             | Sequence                                                         |
| mRBM38F                          | CCCGAATTCATGCTGCTGCAGCCCG                                        |
| mRBM38R                          | CCCCTCGAGCTGCATCCTGTGTCAGGCTGTAG                                 |
| RBM38ΔNF                         | CCCGAATTCATGACCAAGATCTTCGTGGGCG                                  |
| RBM38ΔCR                         | CCCCTCGAGCAGGTAGGCCAGGTTACATTG                                   |
| Chimera1F                        | CGAATTCATGCACACCACCCAGAAGGACACGACGTAC<br>ACCAAGATCTTCGTGGGCGGCCT |
| Chimera2R                        | TGCTCCCAAGTATGCCAGGTTACATTGGCCTTGCG                              |
| Chimera3F                        | CGCAAGGCCAATGTGAACCTGGCATACTTGGGAGCA                             |
| mRBM24R                          | CCCCTCGAGCTGCATTTCGGTCTGTCTGC                                    |
| ΔRNP1F                           | CGGCAAGTCCGCAGATCGGGCAGCGGC                                      |
| ΔRNP1R                           | CCCGATCTGCGGACTTGCCGGTCTGGC                                      |
| ΔRNP2F                           | G TTCACCAAGCCCTACCACACCACCGAC                                    |
| ΔRNP2R                           | TGTGGTAGGGCTTGGTGAACGTGGTGTC                                     |
| SMEK2 int4 cloning for<br>EcoRI  | GCCGCCGAATTCAAATGTGTGTGTAGGCTGGGTG                               |
| SMEK2 int4 cloning rev<br>XhoI-3 | GCCGCCCTCGAGGCACCCAGTTCAGTACCTTAGC                               |
|                                  |                                                                  |
| For RT-qPCR                      |                                                                  |
| Name                             | Sequence                                                         |
| 18S rRNA for                     | GTTGGTGGAGCGATTTGTCTGGTT                                         |
| 18S rRNA rev                     | TATTGCTCAATCTCGGGTGGCTGA                                         |
| SMEK2 Ex3 for                    | TGCCTTTACCGTCTCCTAAGAGTG                                         |
| SMEK2 Ex3 rev                    | ATTGCCGGTCTTCGTTTCAGGGTAT                                        |
| SMEK2 Ex5 for                    | TGTTTGGTCAGAAGCAGAGAA                                            |
| SMEK2 Ex5 rev                    | TTTCCCAGATCTCATCACAGC                                            |
| SMEK2 Ex19 for                   | GGAAGTTTGGTTGGCTTAGTGG                                           |
| SMEK2 Ex19 rev                   | GCTCACTGAACAGTTGCAGCATTG                                         |
| CDK6 Ex2 for                     | AGTACGAATGCGTGGCGGAGAT                                           |
| CDK6 Ex2 rev                     | AAACGGCCTCCGTTCTTCAAGT                                           |
| CDK6 Ex8 for                     | CTGCTGACCAATTGTGCTGCCATT                                         |
| CDK6 Ex8 rev                     | CACACACACATGCACACACACACT                                         |
| VEGF Ex1 for                     | GAGGCGCAGCGGTTAGGT                                               |
| VEGF Ex1 rev                     | CGGATCAATGAATATCAAATTCCA                                         |
| VEGF Ex8 for                     | CTGGCGCTGAGCCTCTCTAC                                             |
| VEGF Ex8 rev                     | CCGGTGTCCCTCATCCCTGTA                                            |
| CDK6 Ex2-3 spliced for           | AGGCACCTGGAGACCTT                                                |
| CDK6 Ex2-3 spliced rev           | TGGTTTCTCTGTCTGTTCGTG                                            |
| SMEK2 Ex4-5 unspliced for        | CCCTATTCTACAGTTCGGATAACC                                         |
| SMEK2 Ex4-5 unspliced rev        | AGTTCTCTGCTTCTGACCAAAC                                           |



Table S4. List of plasmids used in this study.

| Name                  |                                                                        |
|-----------------------|------------------------------------------------------------------------|
| Rbm38 WT              | Myc-tagged Rbm38                                                       |
| Rbm38 $\Delta$ N      | N-terminal deletion mutant of Rbm38                                    |
| Rbm38 $\Delta$ C      | C-terminal deletion mutant of Rbm38                                    |
| Rbm38 $\Delta$ N+C    | N- and C-terminal deletion mutant of Rbm38                             |
| Rbm24N-38             | N-terminal region of Rbm38 is replaced by that of Rbm24                |
| Rbm38-24C             | C-terminal region of Rbm38 is replaced by that of Rbm24                |
| Rbm24N-38RRM-24C      | Both N- and C-terminal regions of Rbm38 are replaced by those of Rbm24 |
| Rbm38 $\Delta$ RNP1   | RNP1 deletion mutant of Rbm38                                          |
| Rbm38 $\Delta$ RNP2   | RNP2 deletion mutant of Rbm38                                          |
| Rbm38 $\Delta$ RNP1+2 | RNP1 and RNP2 deletion mutant of Rbm38                                 |
